# Supplementary material
Source: PubMed Central journal article supplement (PMC5935540)

Figure S4

A.

| Chemical | Spheroid KS p-value | Retest KS p-value | Retest Fold-Change |
|----------|---------------------|-------------------|--------------------|
| SW157765 | 8.80E-56            | 5.1E-04           | 23                 |
| SW196788 | 3.70E-19            | NA                | NA                 |
| SW087454 | 1.00E-15            | 0.093             | 1                  |
| SW044749 | 3.30E-13            | NA                | NA                 |
| SW208097 | NA                  | 9.00E-08          | 24                 |
| SW011146 | NA                  | 4.20E-07          | 47                 |
| SW008135 | 2.40E-05            | NA                | NA                 |
| SW151511 | 0.011               | 4.20E-05          | 2.7                |
| SW036310 | 5.10E-05            | NA                | NA                 |
| SW126788 | NA                  | 7.30E-05          | 11                 |
| SW196128 | 9.80E-05            | NA                | NA                 |
| SW059447 | NA                  | 0.00062           | 1.4                |
| SW001286 | NA                  | 0.00067           | 1.2                |
| SW056245 | .61                 | 1                 | 2.7                |
| SW174769 | 0.0024              | 0.99              | 1                  |
| SW167255 | NA                  | 0.0027            | 2.7                |
| SW140154 | 0.16                | 0.016             | 2.7                |
| SW027949 | 0.18                | 1                 | 1                  |
| SW008456 | NA                  | 0.35              | 1.8                |
| SW018825 | 0.43                | 1                 | 0.25               |
| SW196276 | NA                  | 0.9               | 1                  |
| SW118753 | NA                  | 0.94              | 0.37               |
| SW087249 | NA                  | 0.99              | 0.61               |
| SW027951 | NA                  | 0.99              | 1                  |
| SW025249 | NA                  | 1                 | 2.2                |
| SW089026 | NA                  | 1                 | 0.012              |

B.

| Gene Set                            | Upregulation p-value |
|-------------------------------------|----------------------|
| ELVIDGE HIF1A TARGETS DN            | 0.033                |
| MAINA VHL TARGETS UP                | 0.011                |
| SASAI TARGETS OF CXCR6 AND PTCH1 UP | 0.02                 |
| TIAN TNF SIGNALING VIA NFKB         | 0.0002               |
| VERRECCHIA RESPONSE TO TGFB1 C5     | 0.018                |

D.

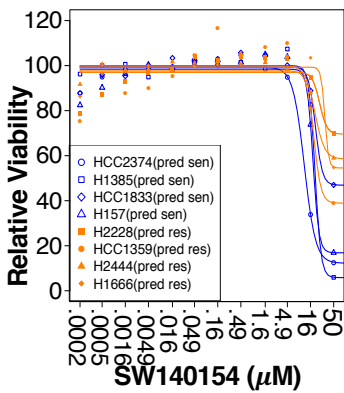

E.

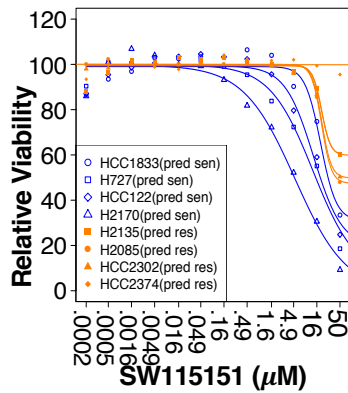

F.

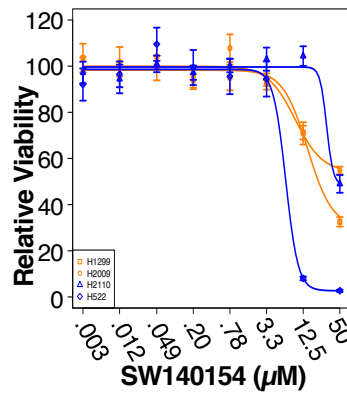

G.

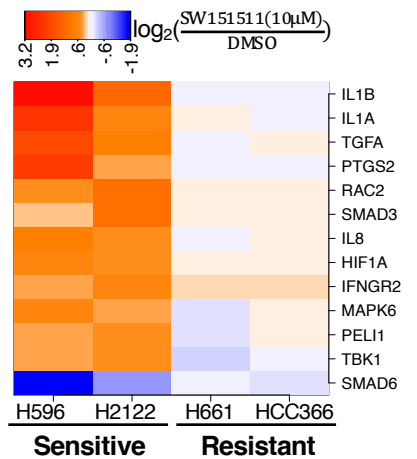

C.

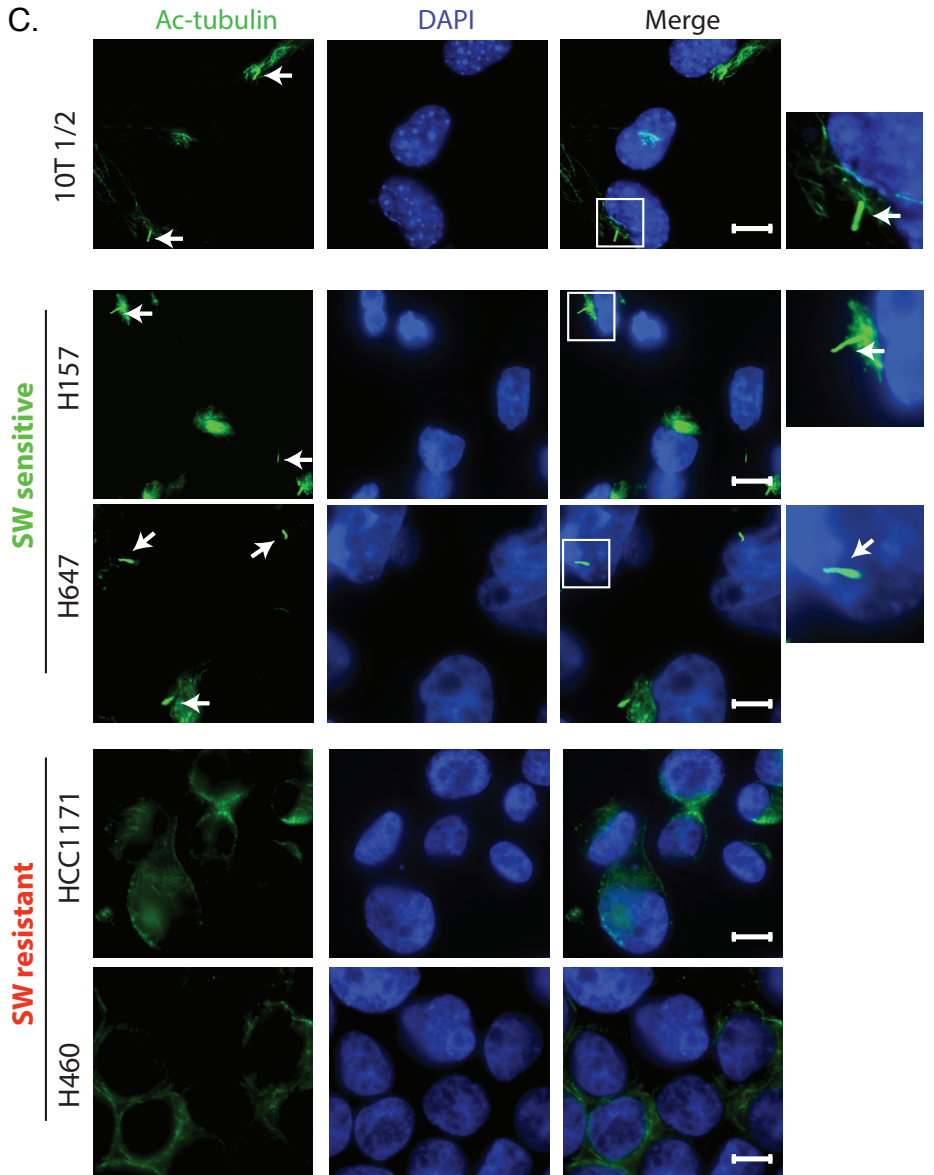

Supplement: NIHMS952460-supplement-10.pdf [file NIHMS952460-supplement-10.pdf]
