# Supplementary material
Source: PubMed Central journal article supplement (PMC5935540)

Figure S5

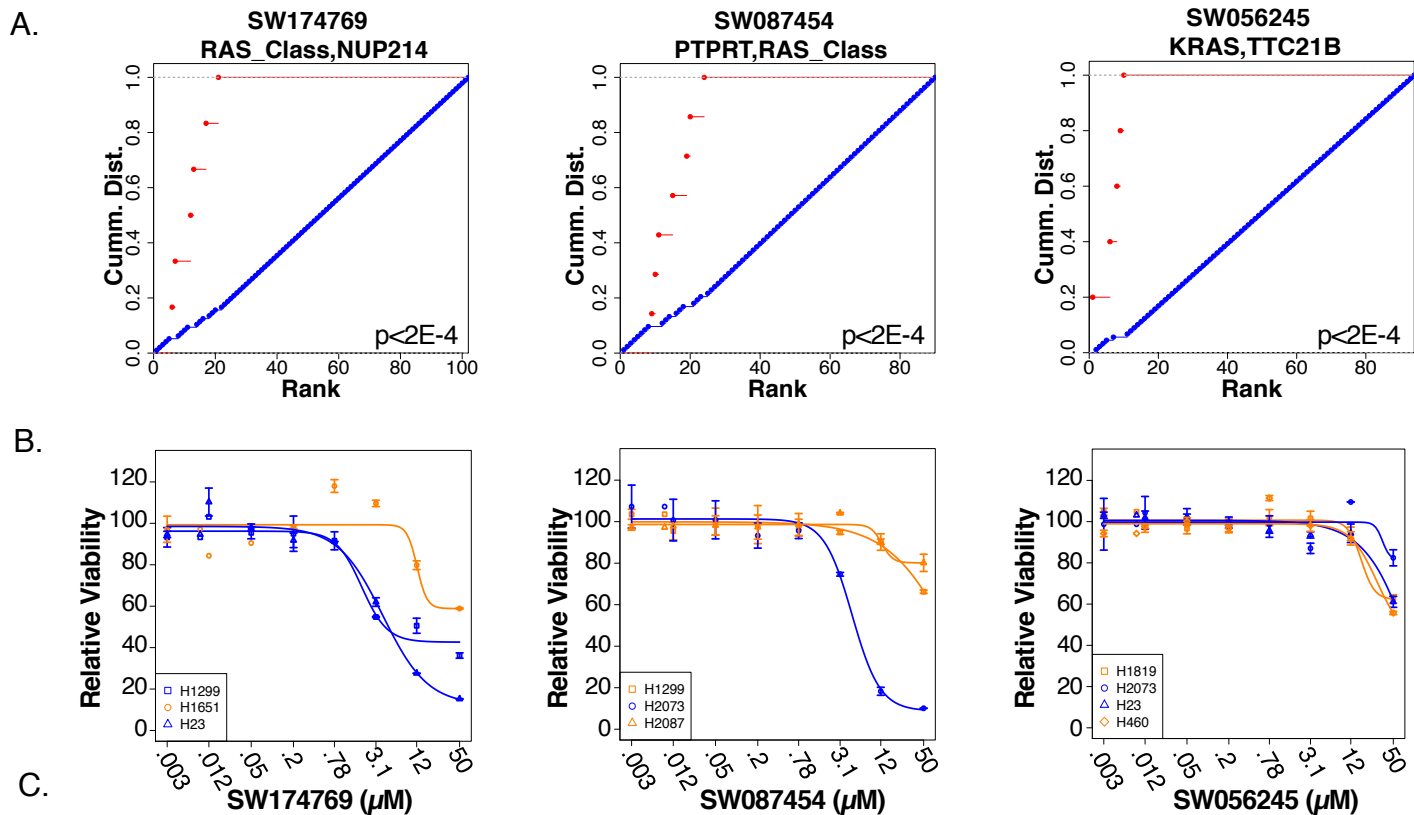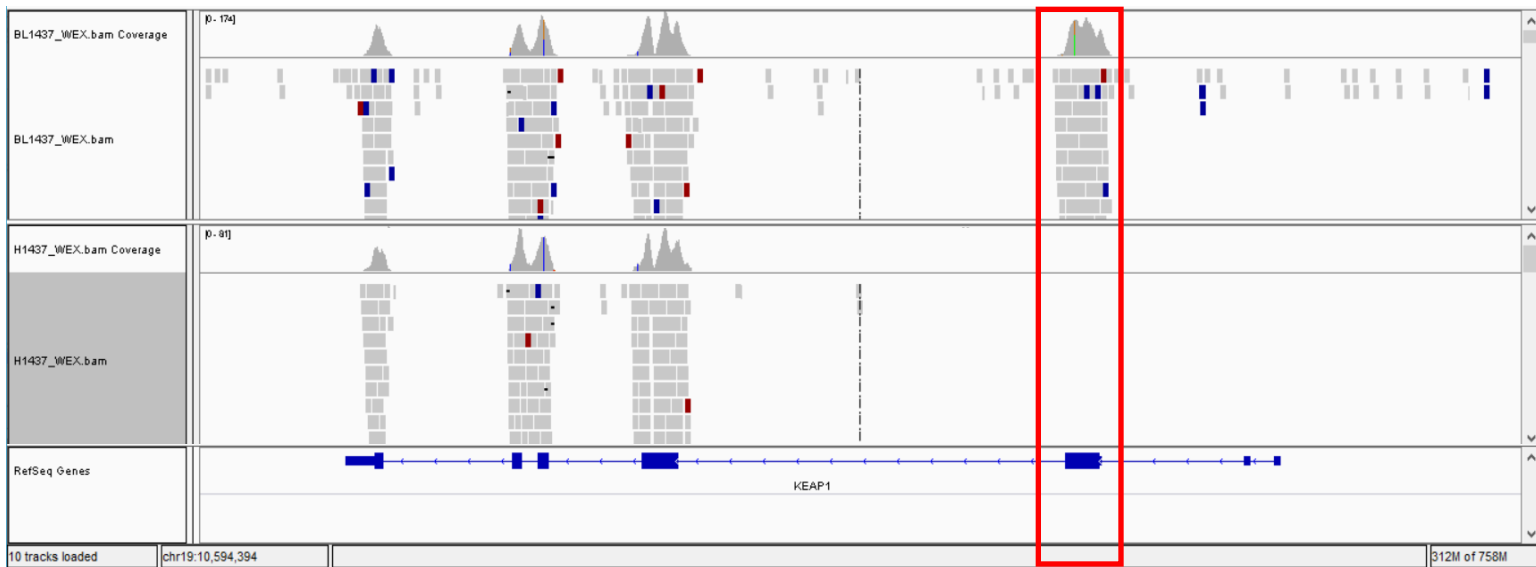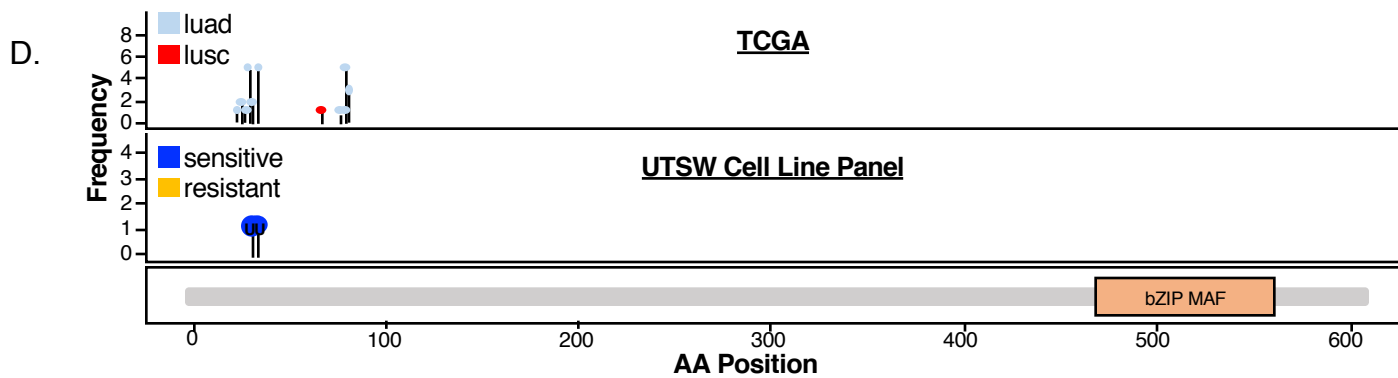

E.

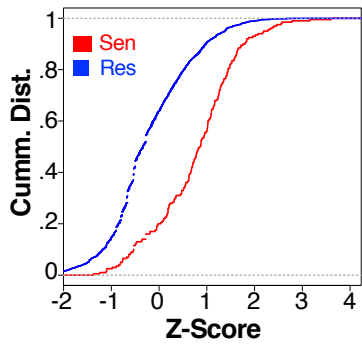

F.

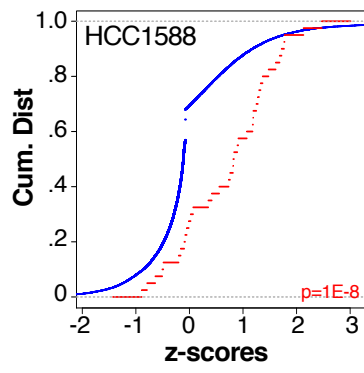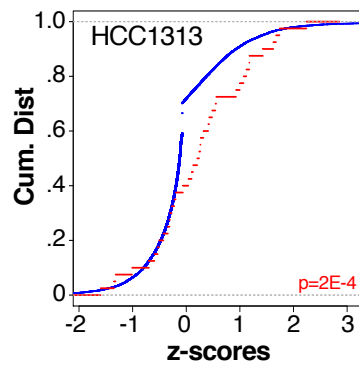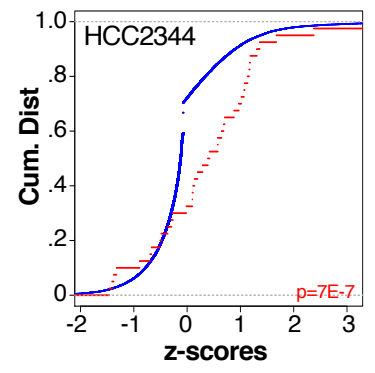

G.

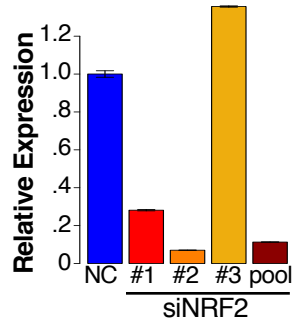

Supplement: NIHMS952460-supplement-11.pdf [file NIHMS952460-supplement-11.pdf]

Figure S6

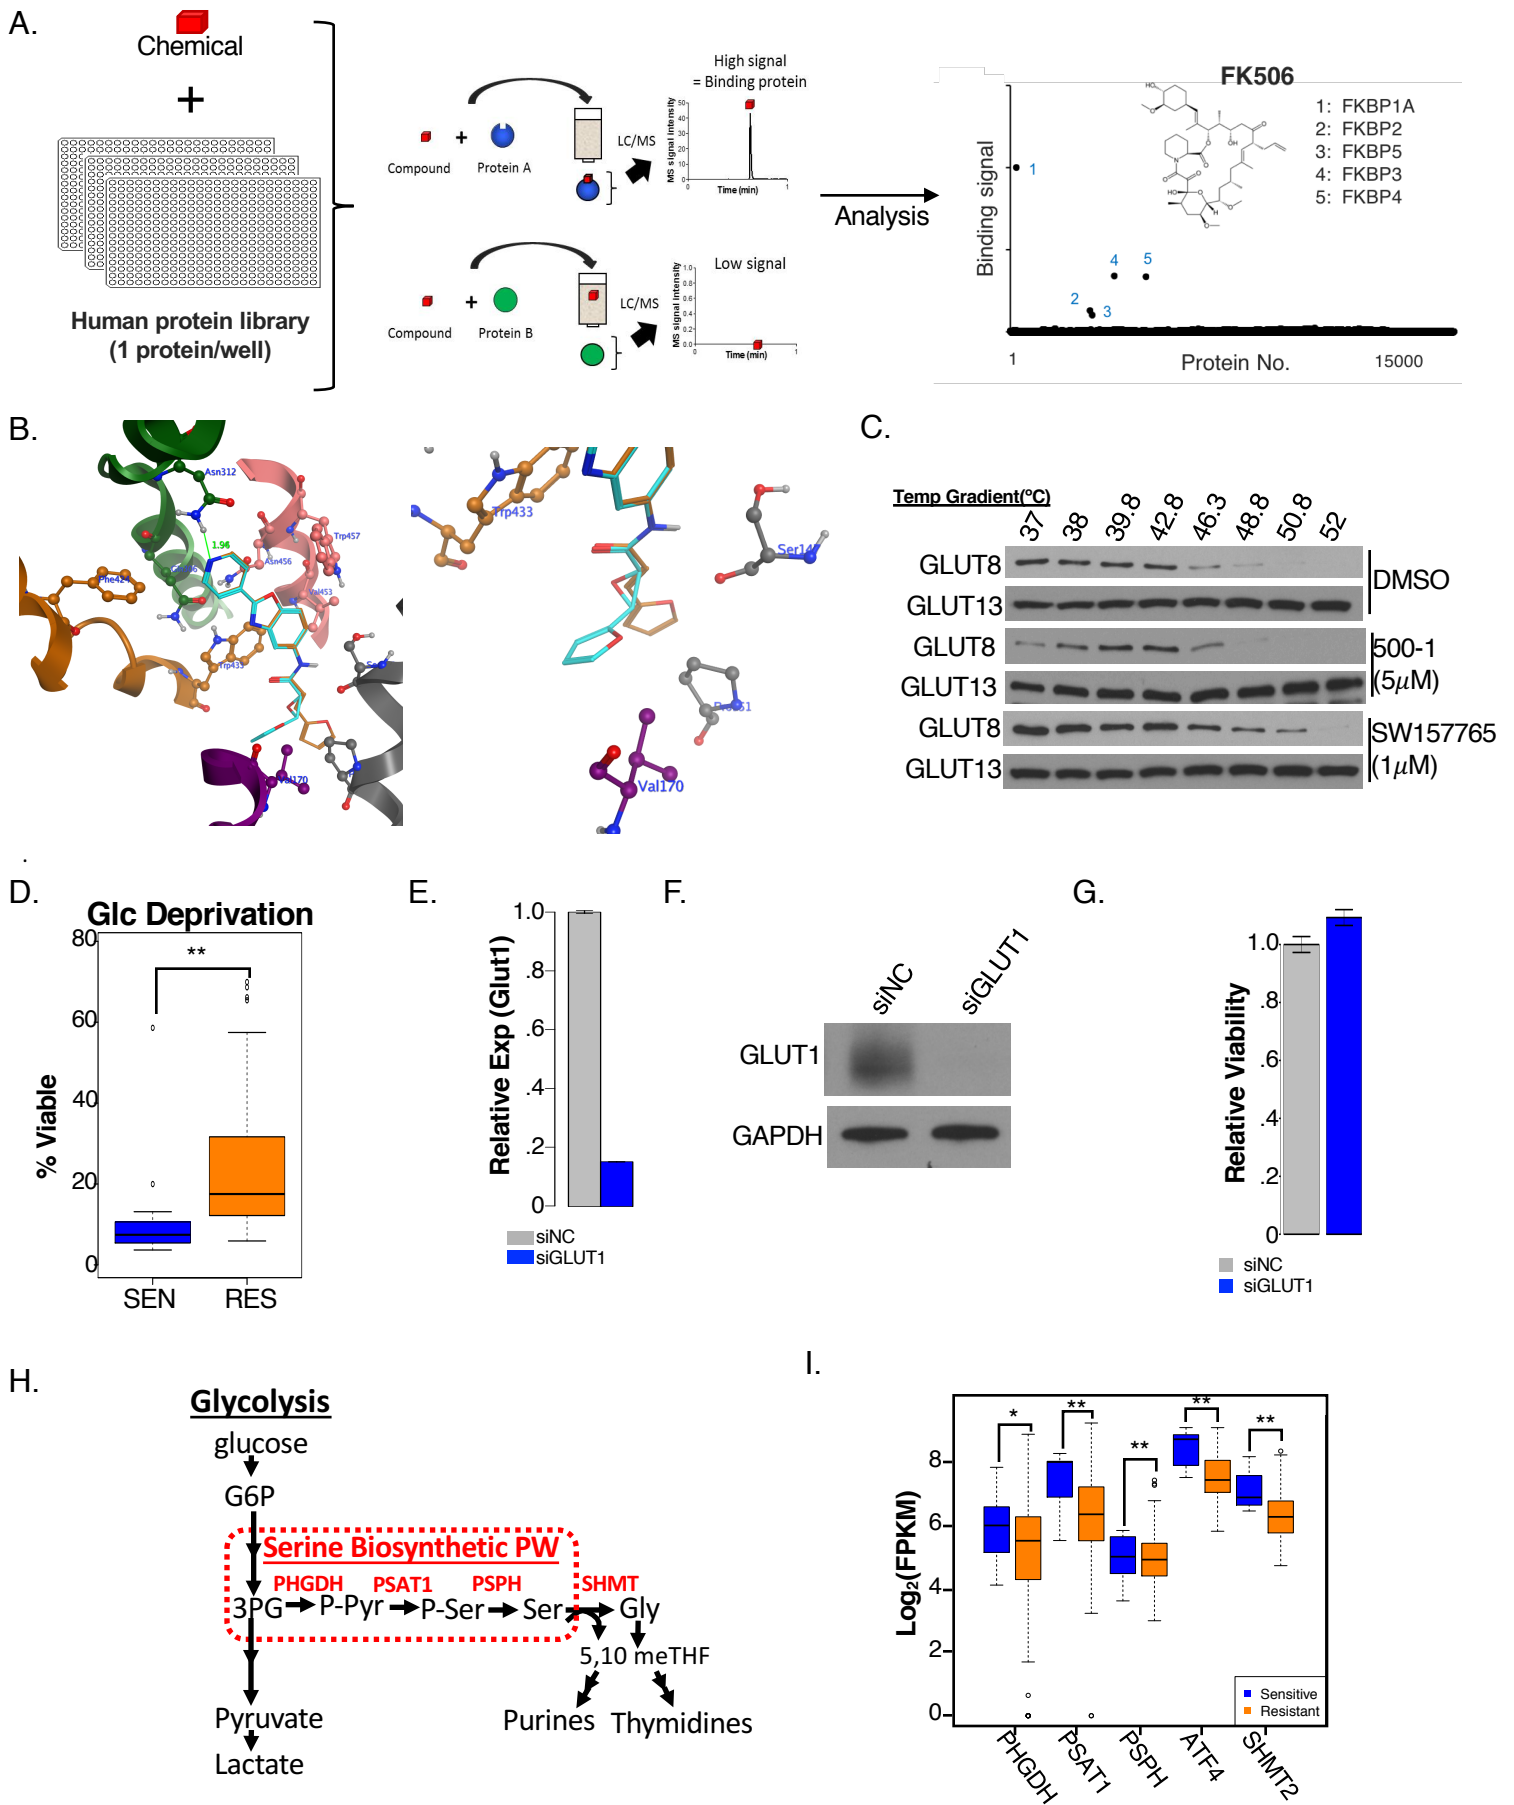

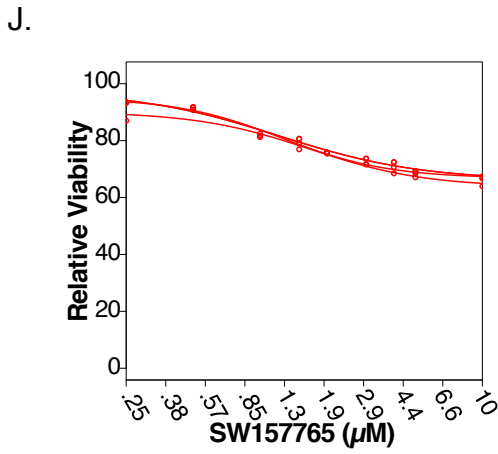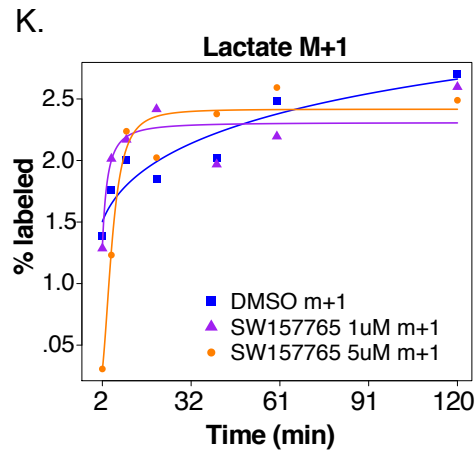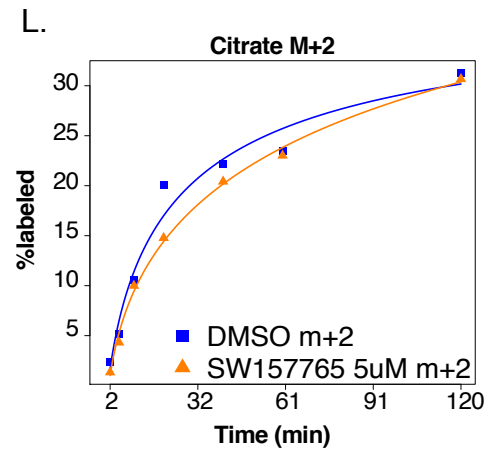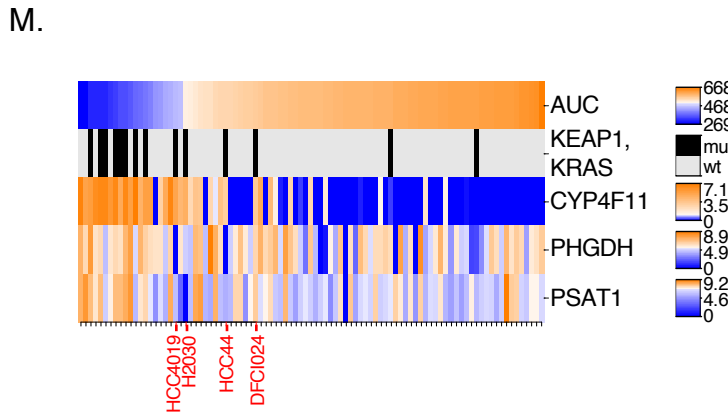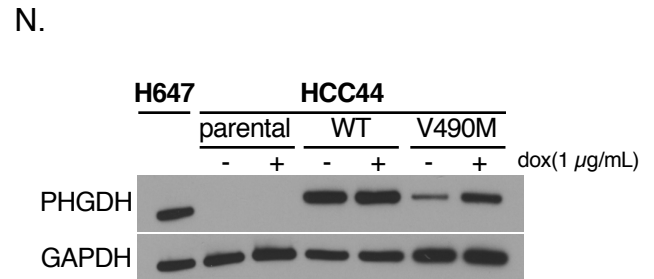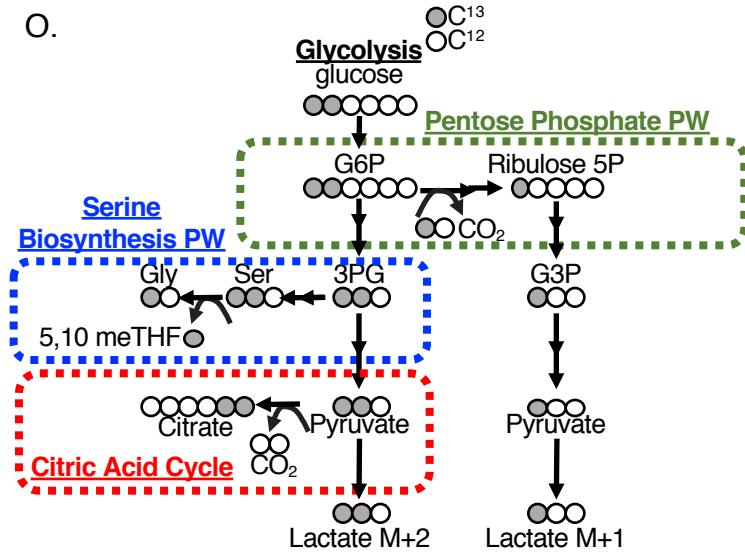

Supplement: NIHMS952460-supplement-12.pdf [file NIHMS952460-supplement-12.pdf]

Figure S1

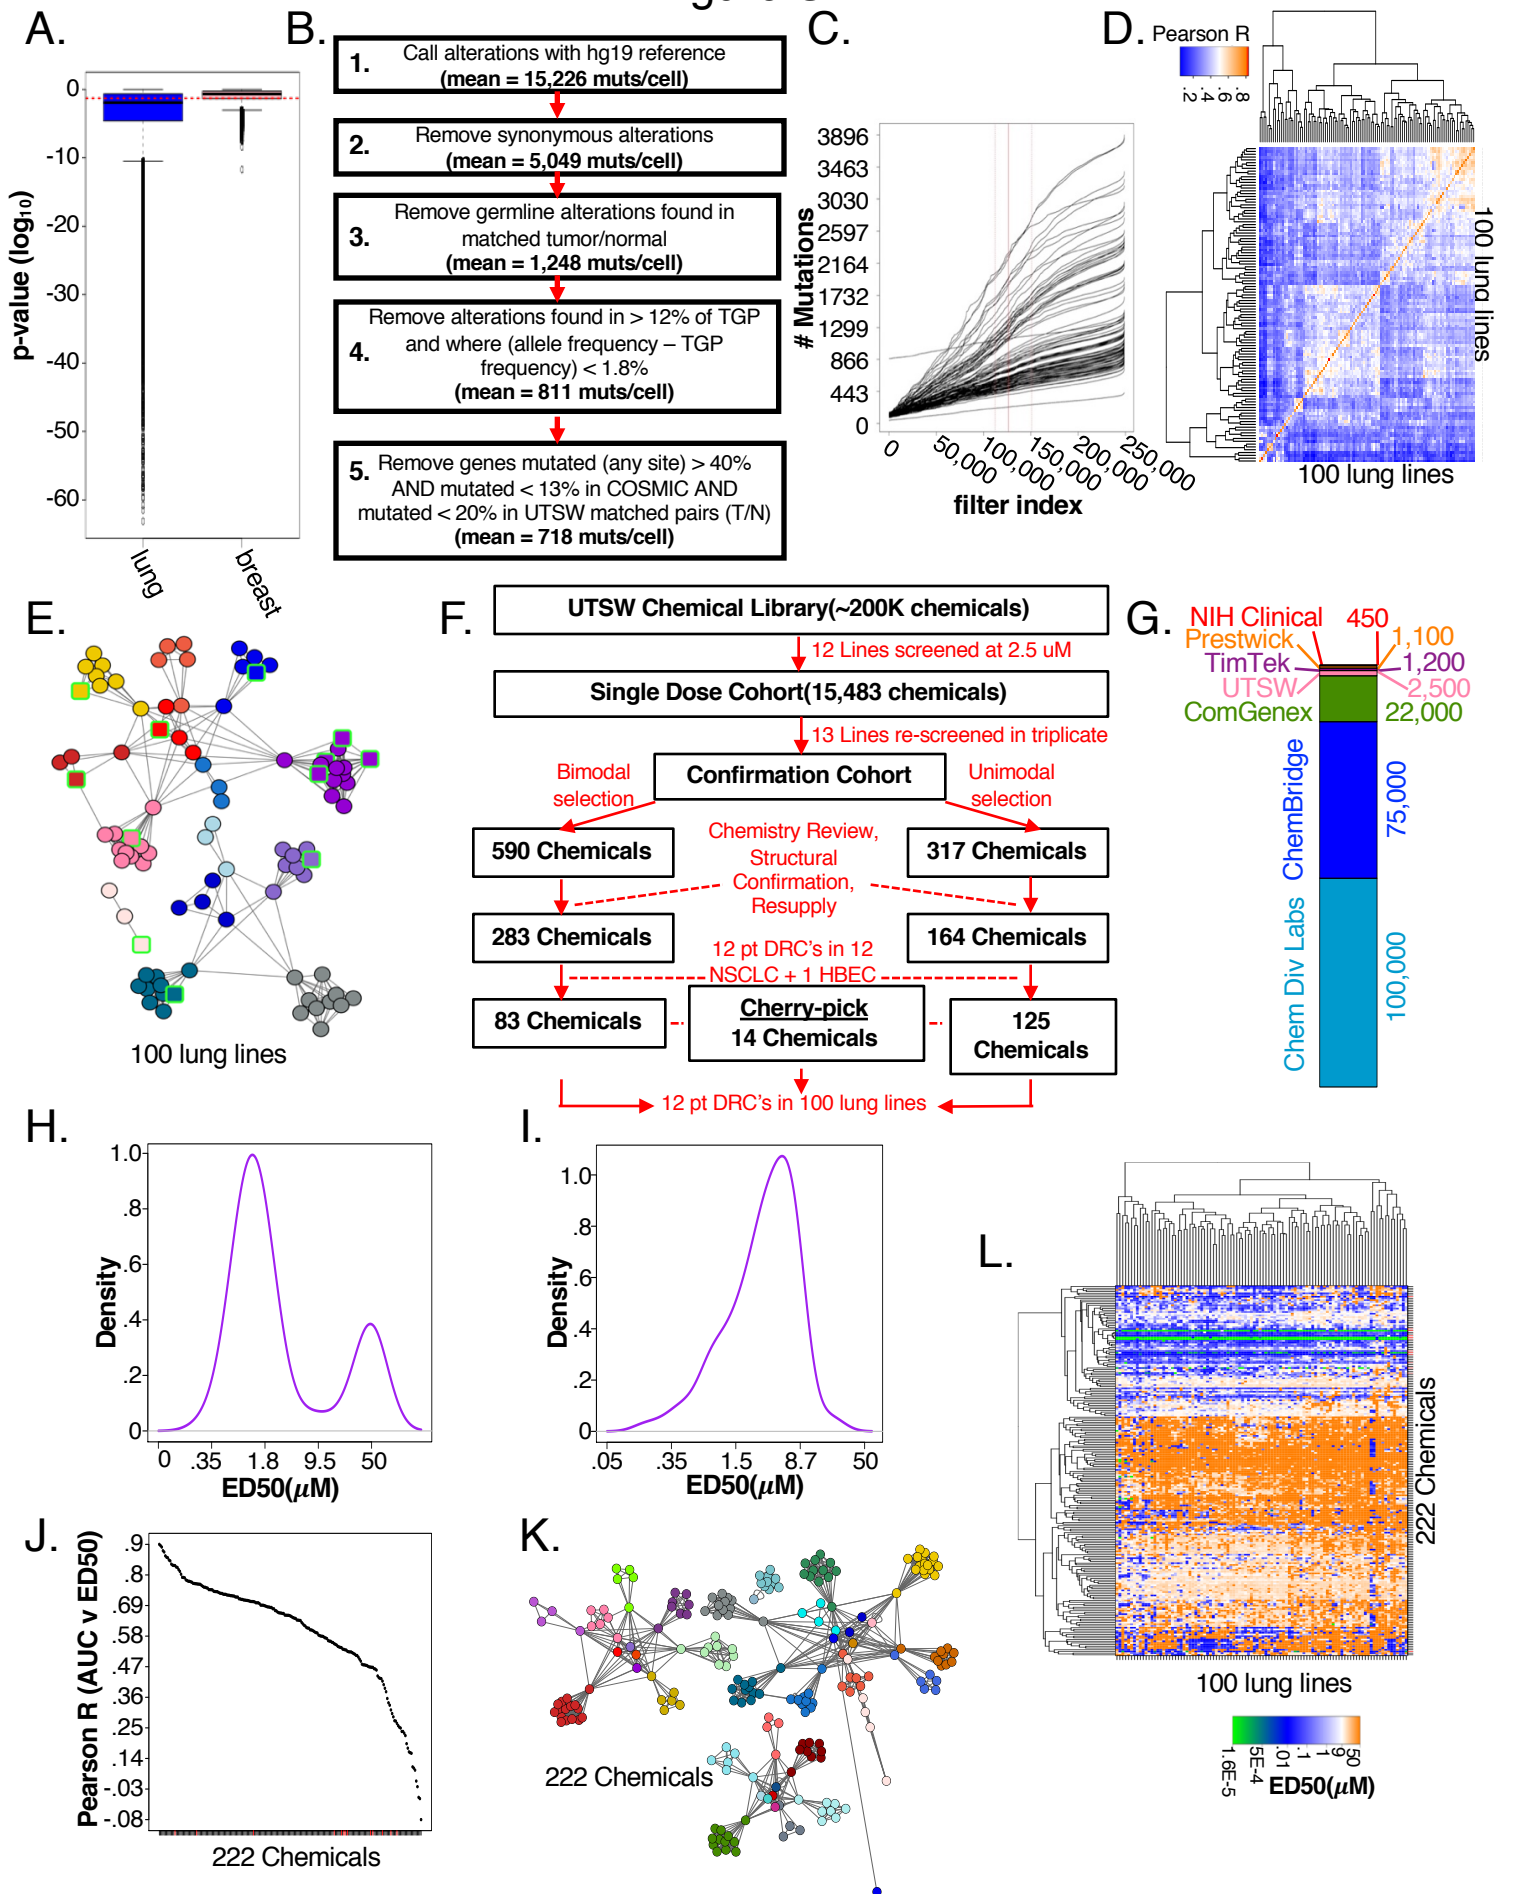

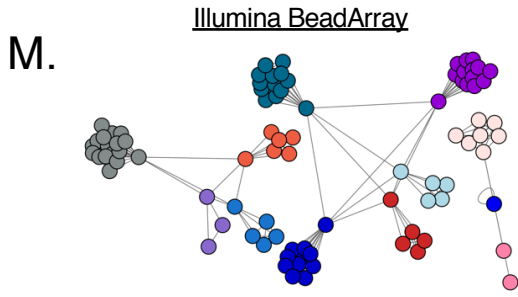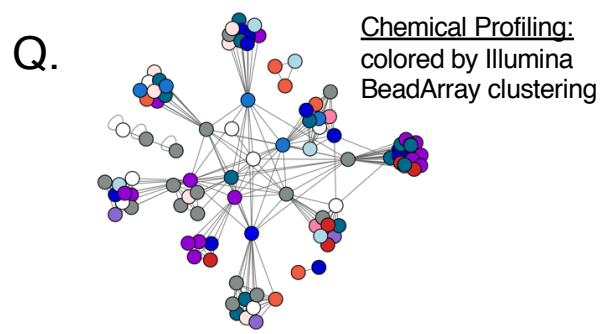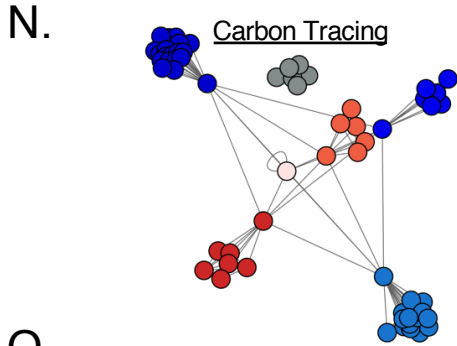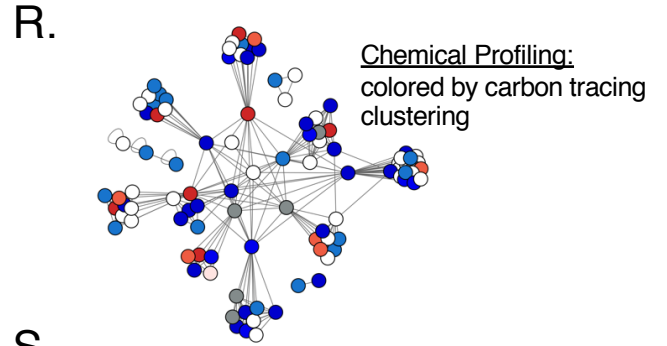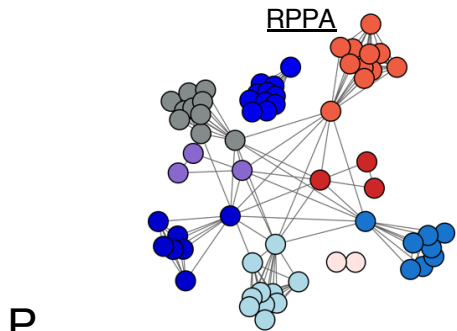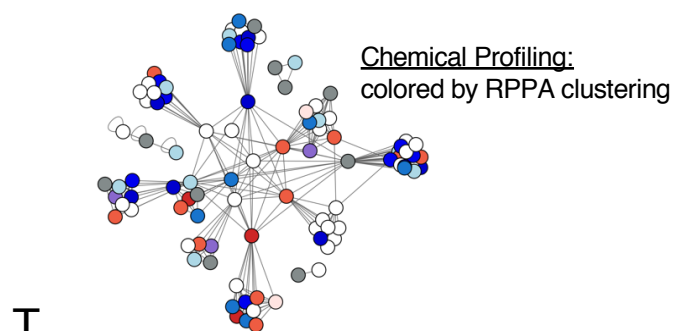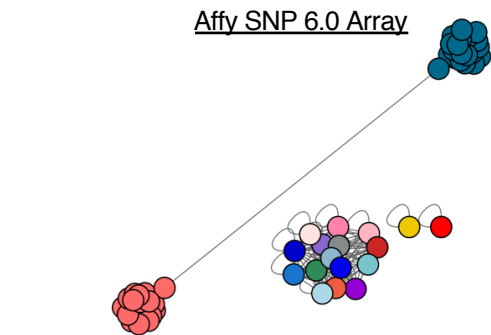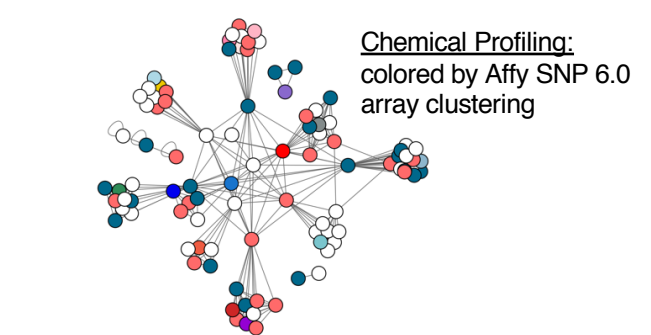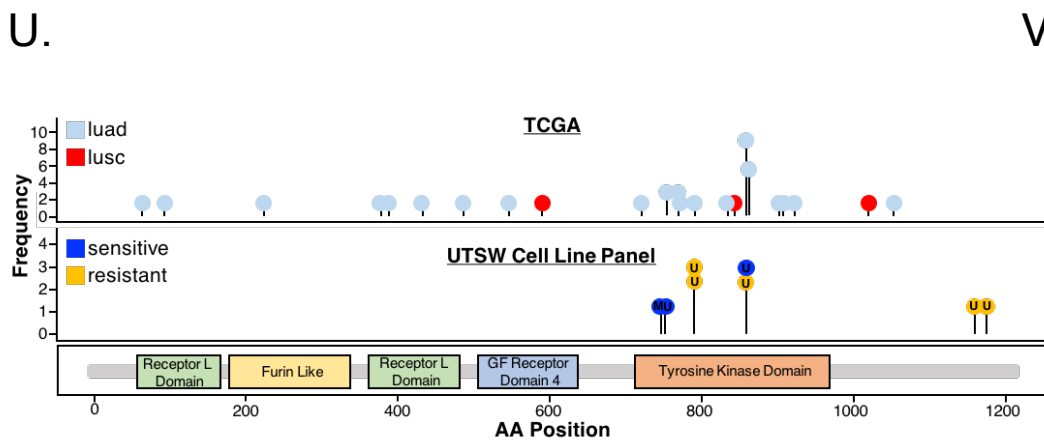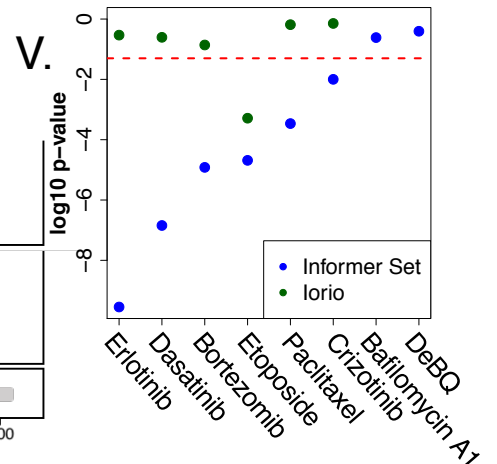

Supplement: NIHMS952460-supplement-7.pdf [file NIHMS952460-supplement-7.pdf]

Figure S2

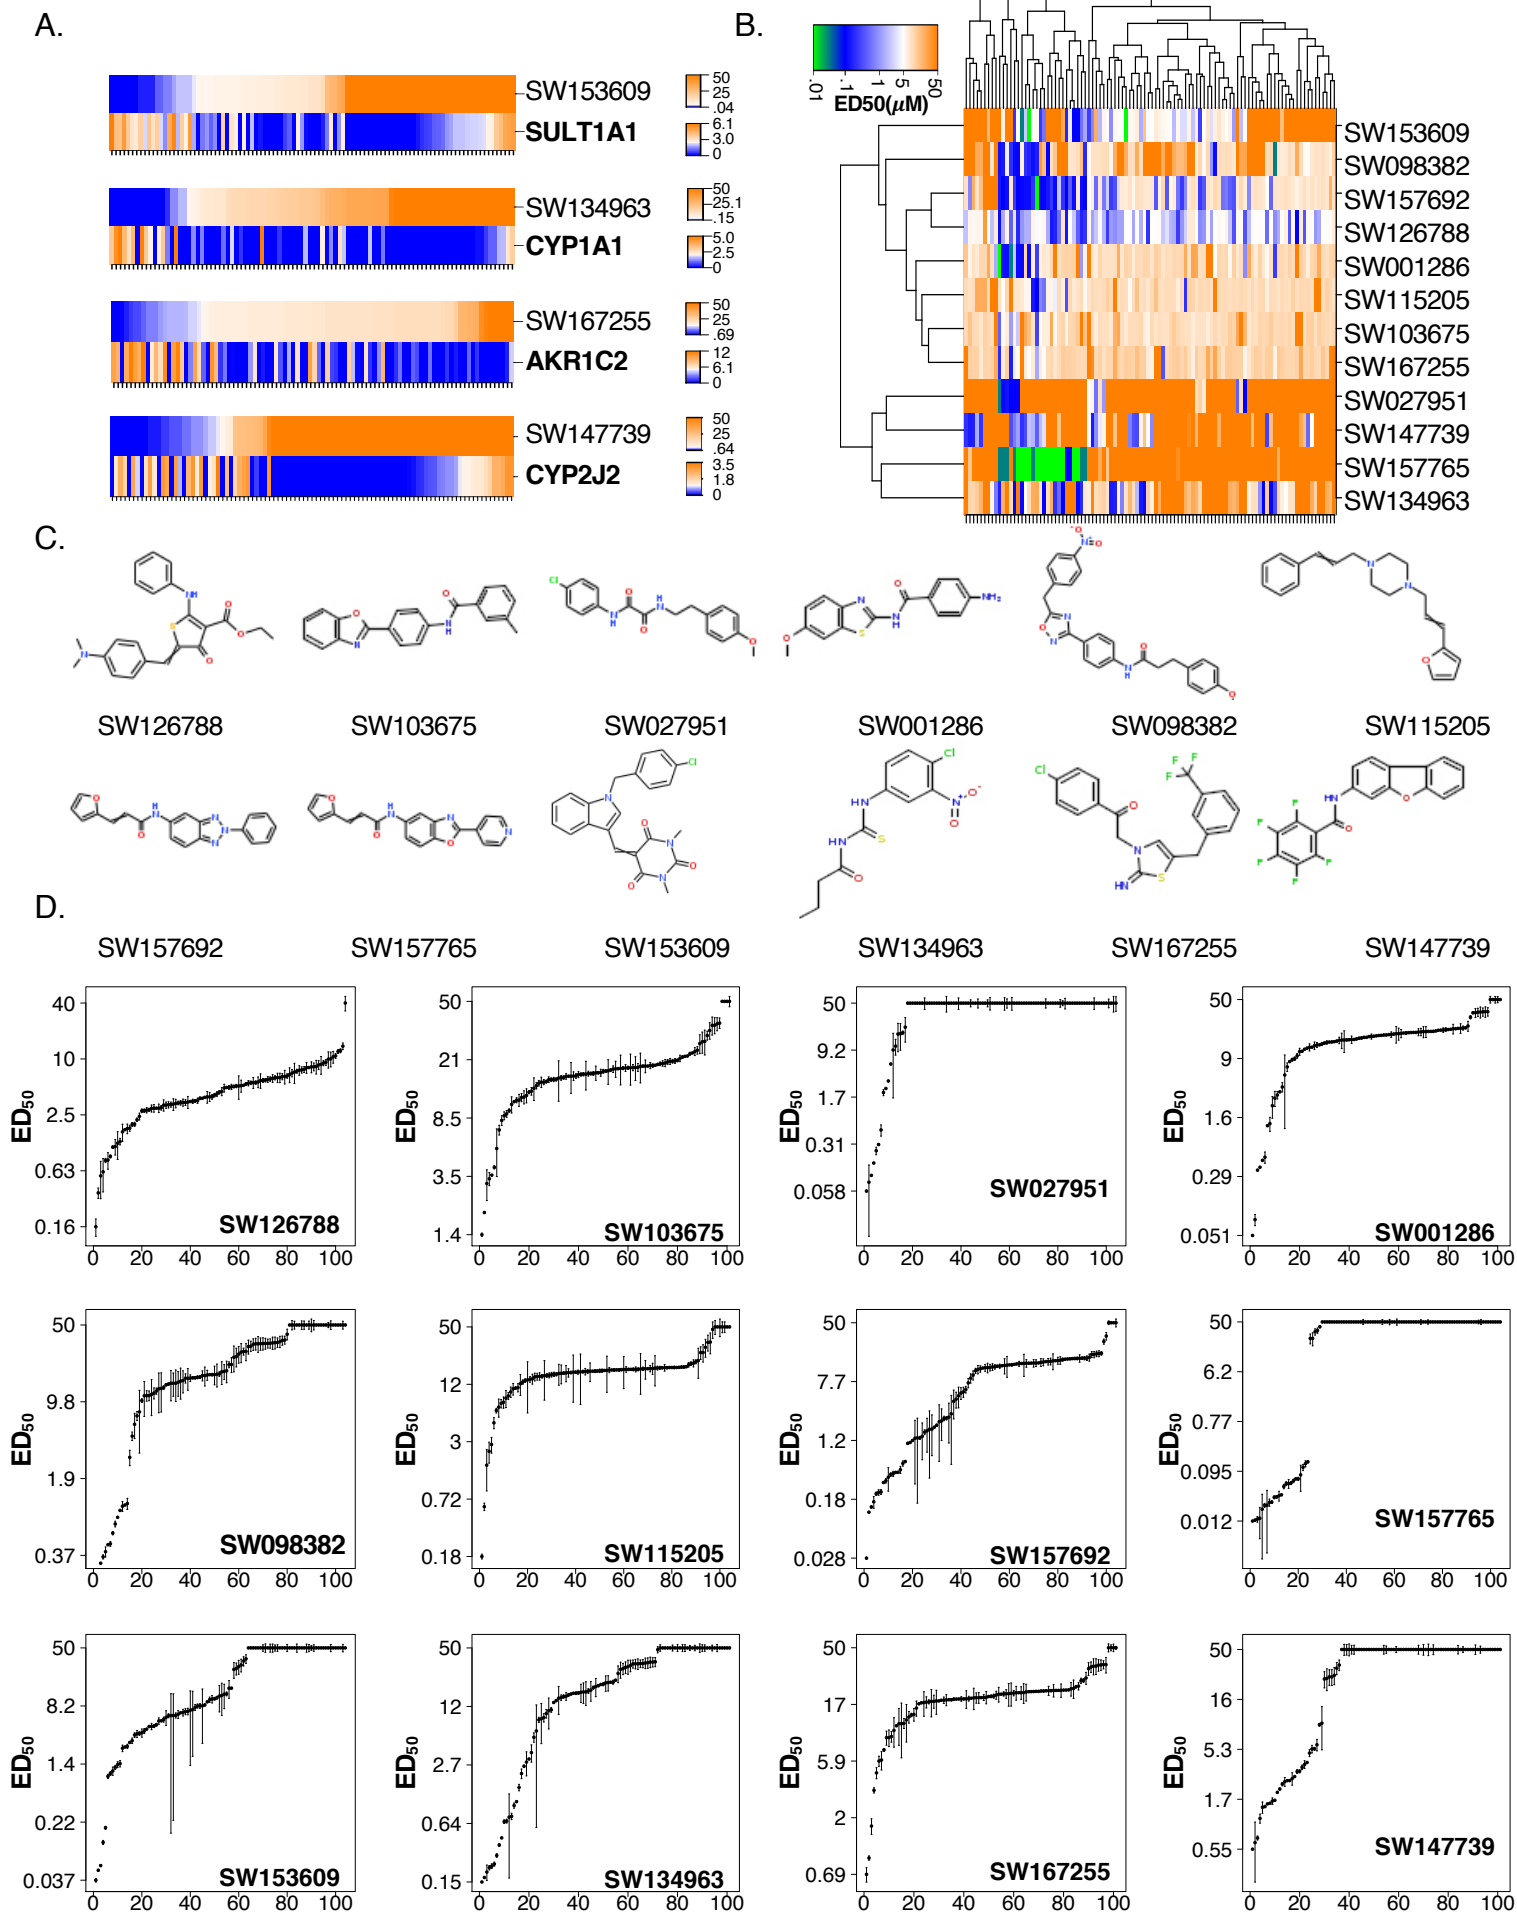



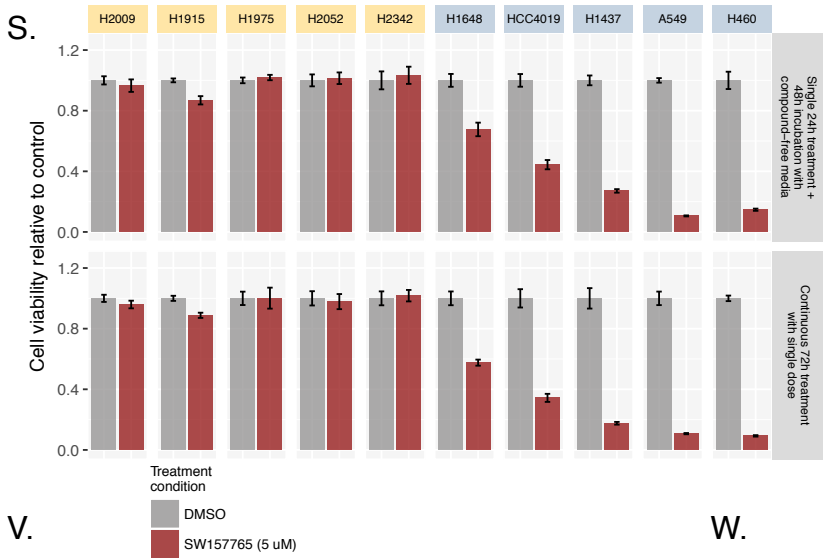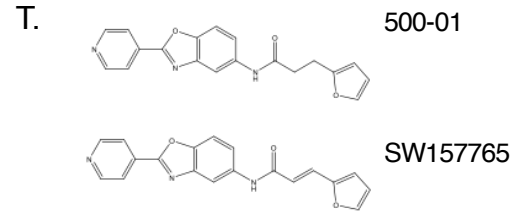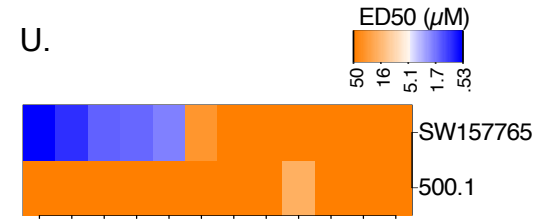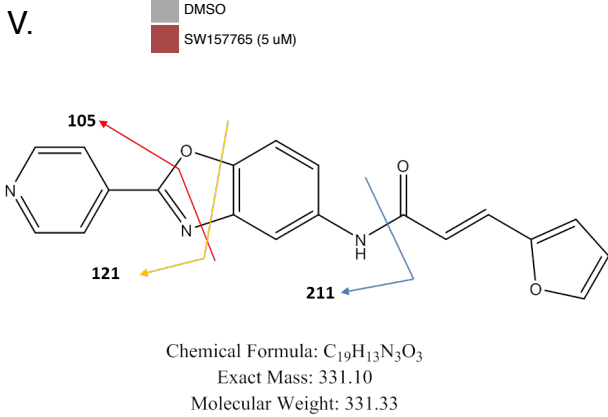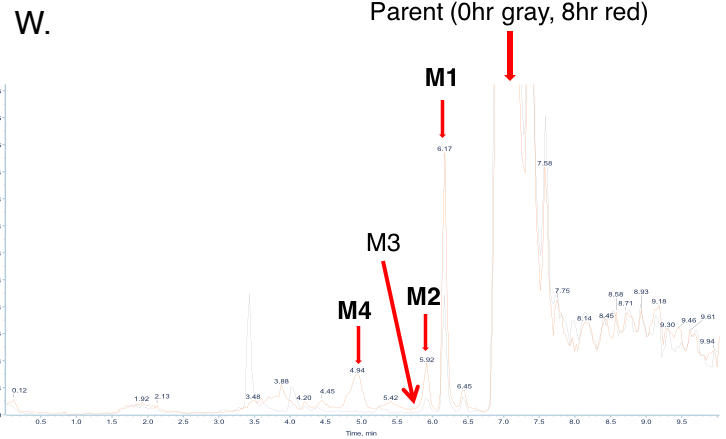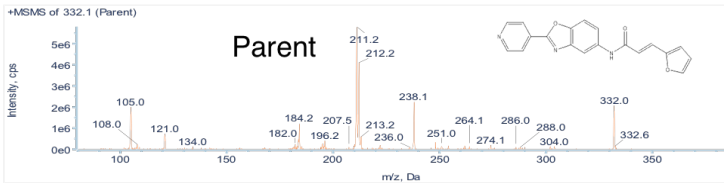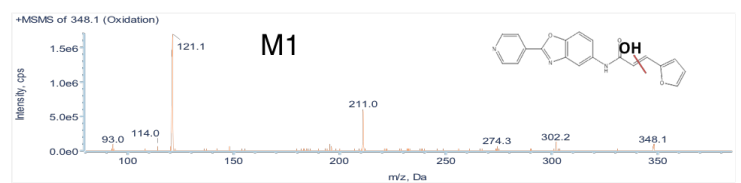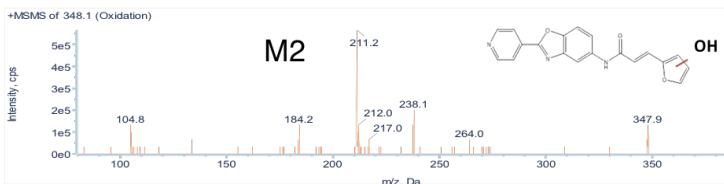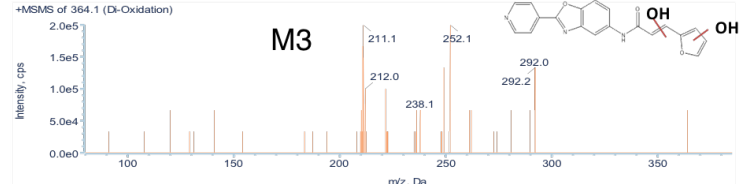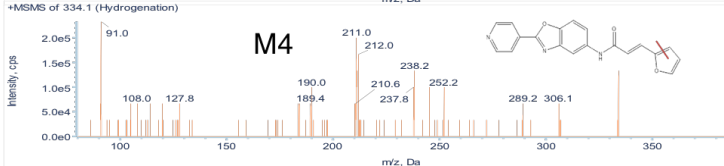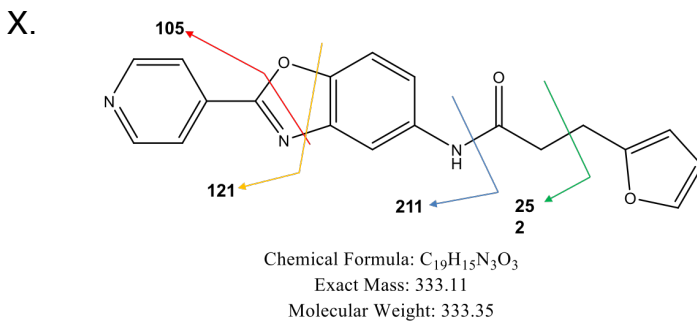

Y.

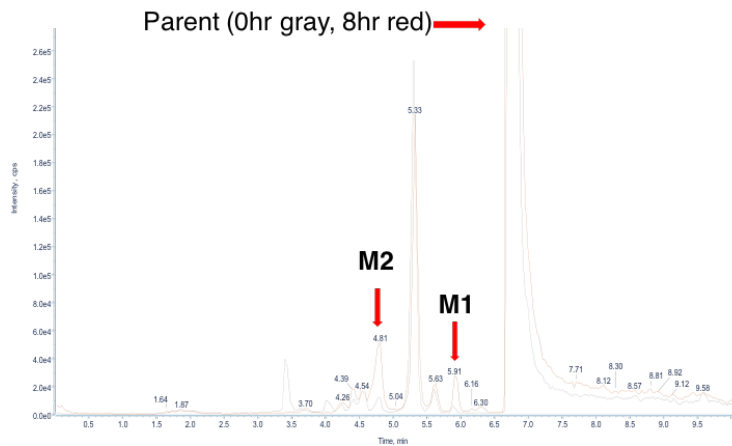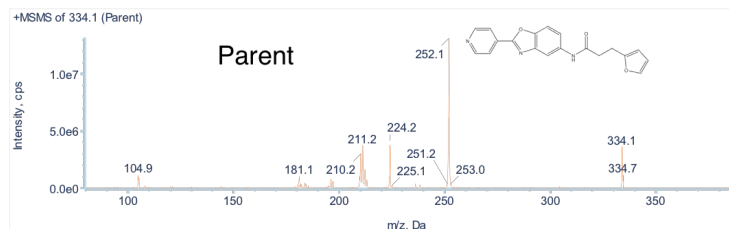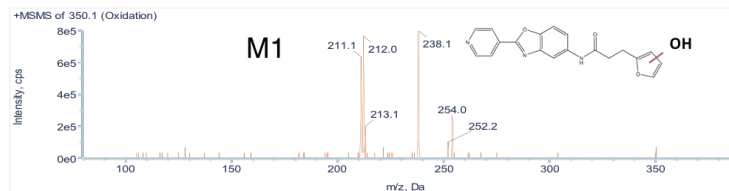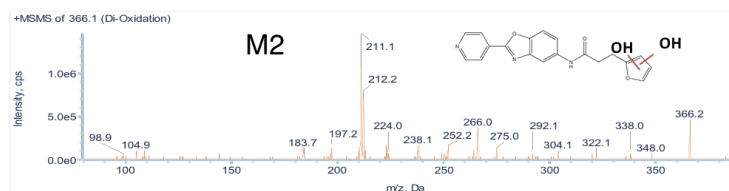

Z.

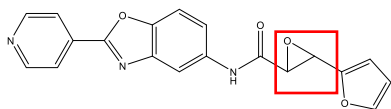

Chemical Formula:  $C_{19}H_{13}N_3O_4$   
 Exact Mass: 347.09  
 Molecular Weight: 347.33

Supplement: NIHMS952460-supplement-8.pdf [file NIHMS952460-supplement-8.pdf]

Figure S3

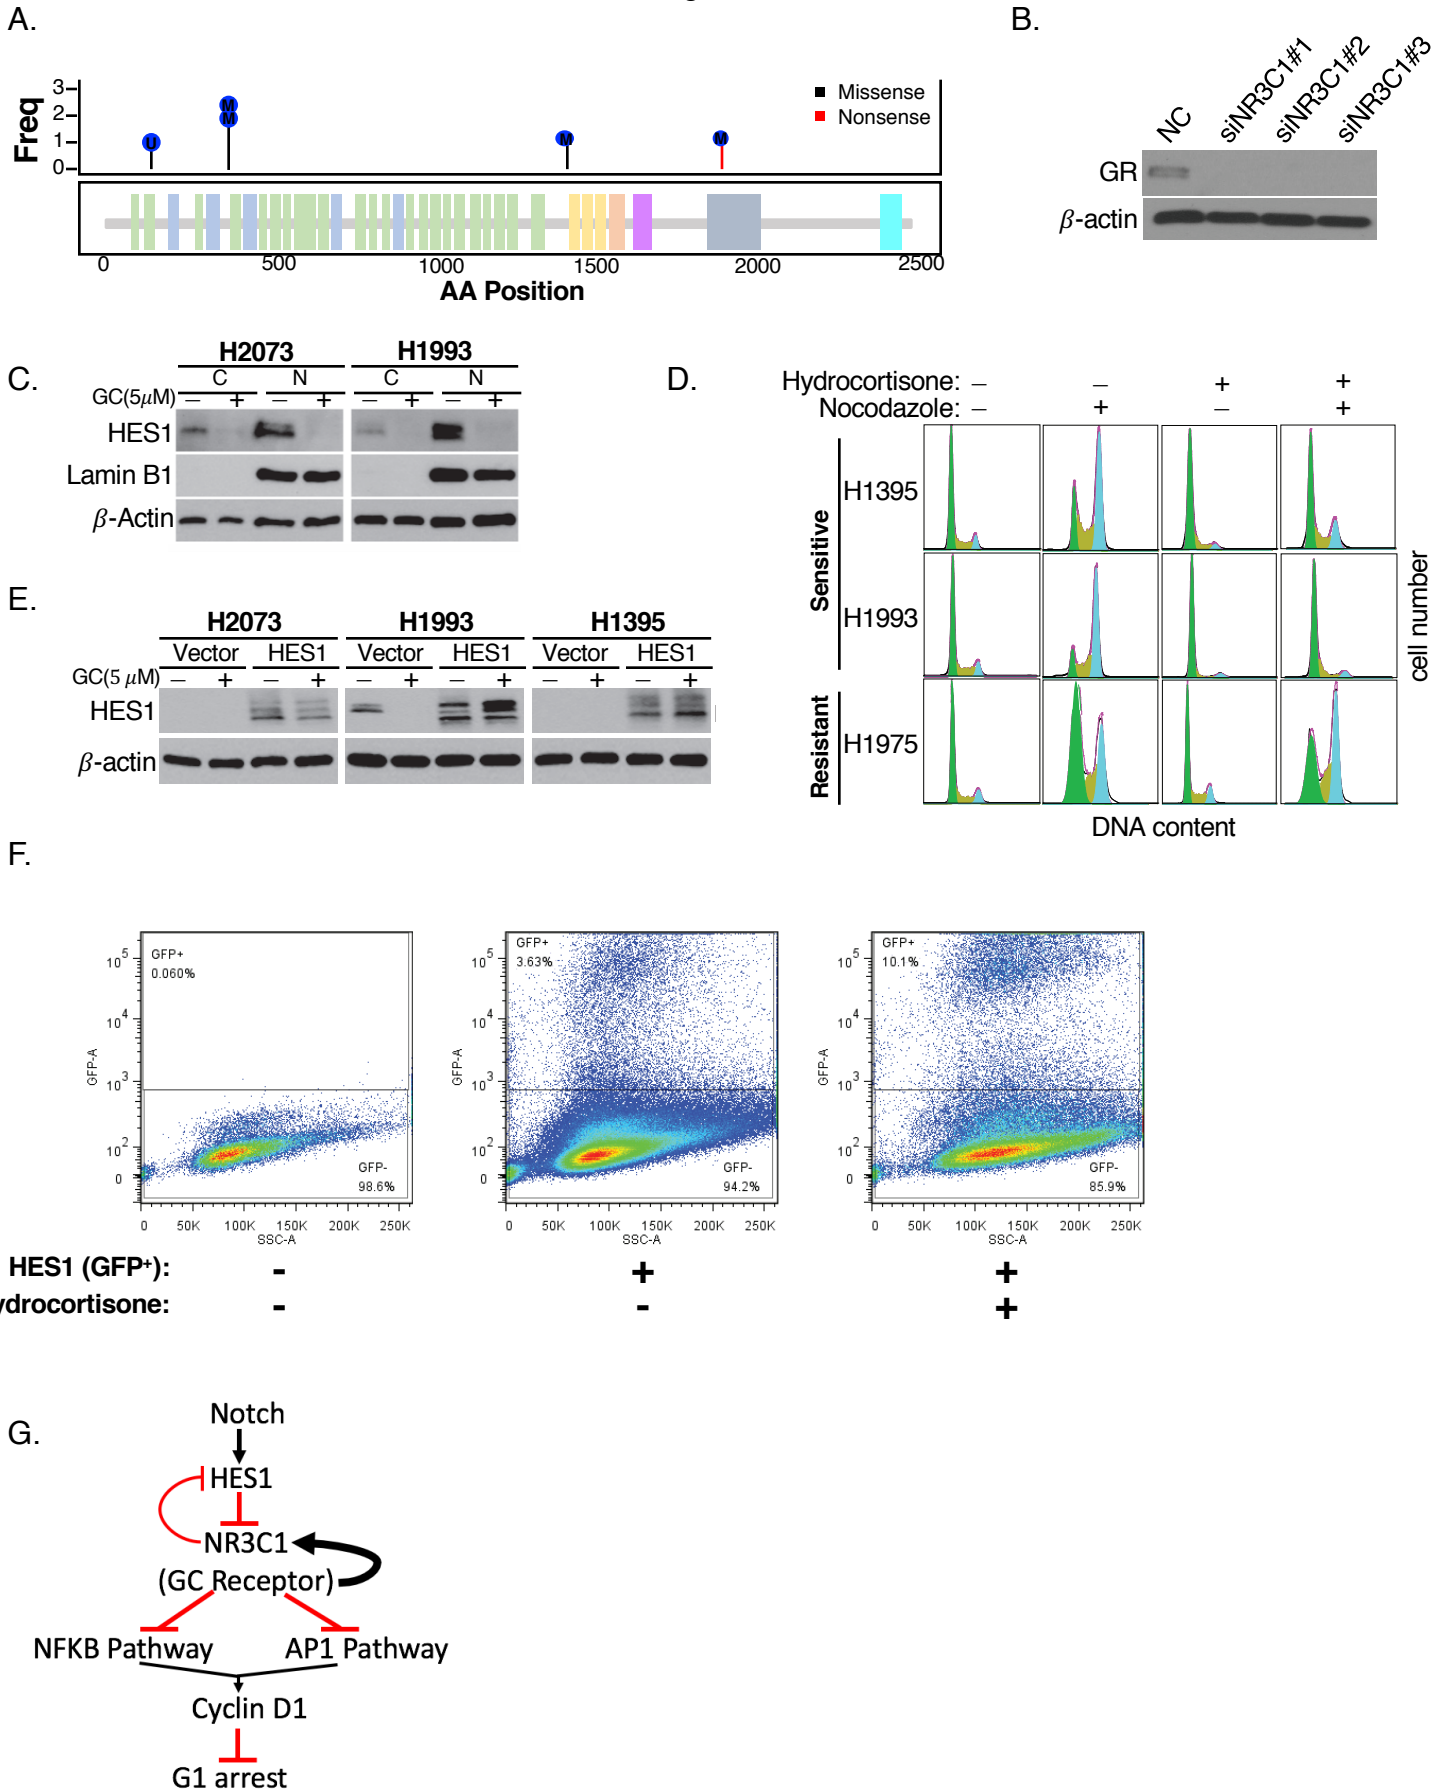

Supplement: NIHMS952460-supplement-9.pdf [file NIHMS952460-supplement-9.pdf]
